# Supplementary figures and images for: ESCRT-III-dependent adhesive and mechanical changes are triggered by a mechanism detecting alteration of septate junction integrity in Drosophila epithelial cells
Source: eLife journal article supplement (doi:10.7554/elife.91246), 2024-02-02

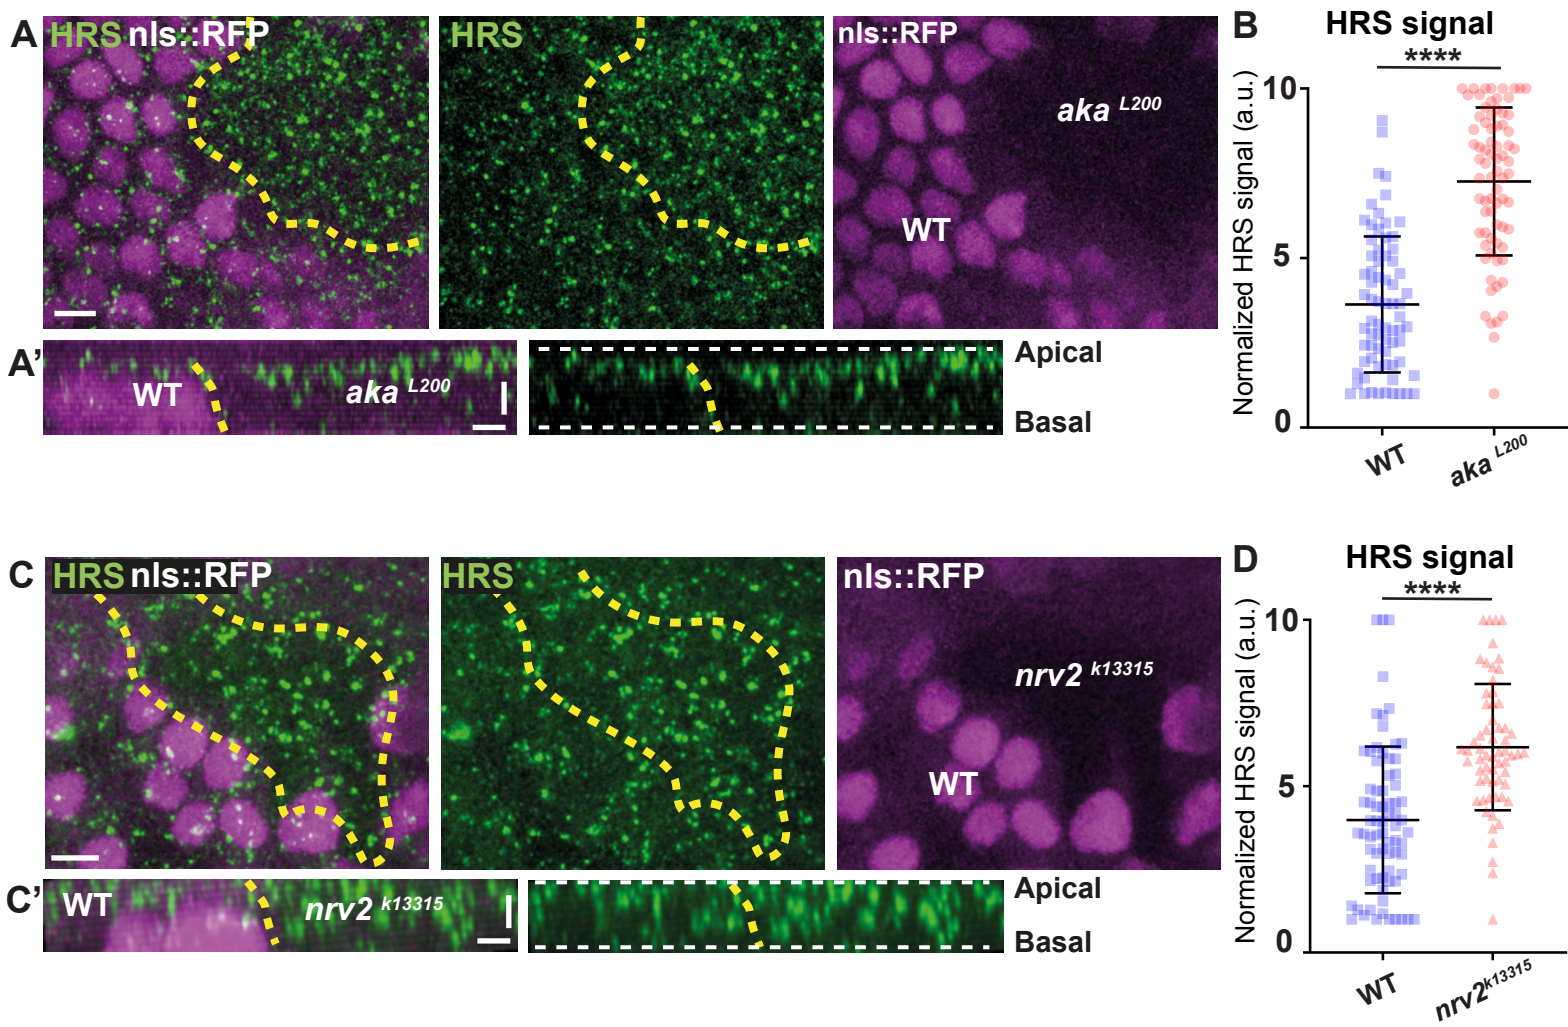

Supplement: supp [file elife-91246-supp-v1.zip]

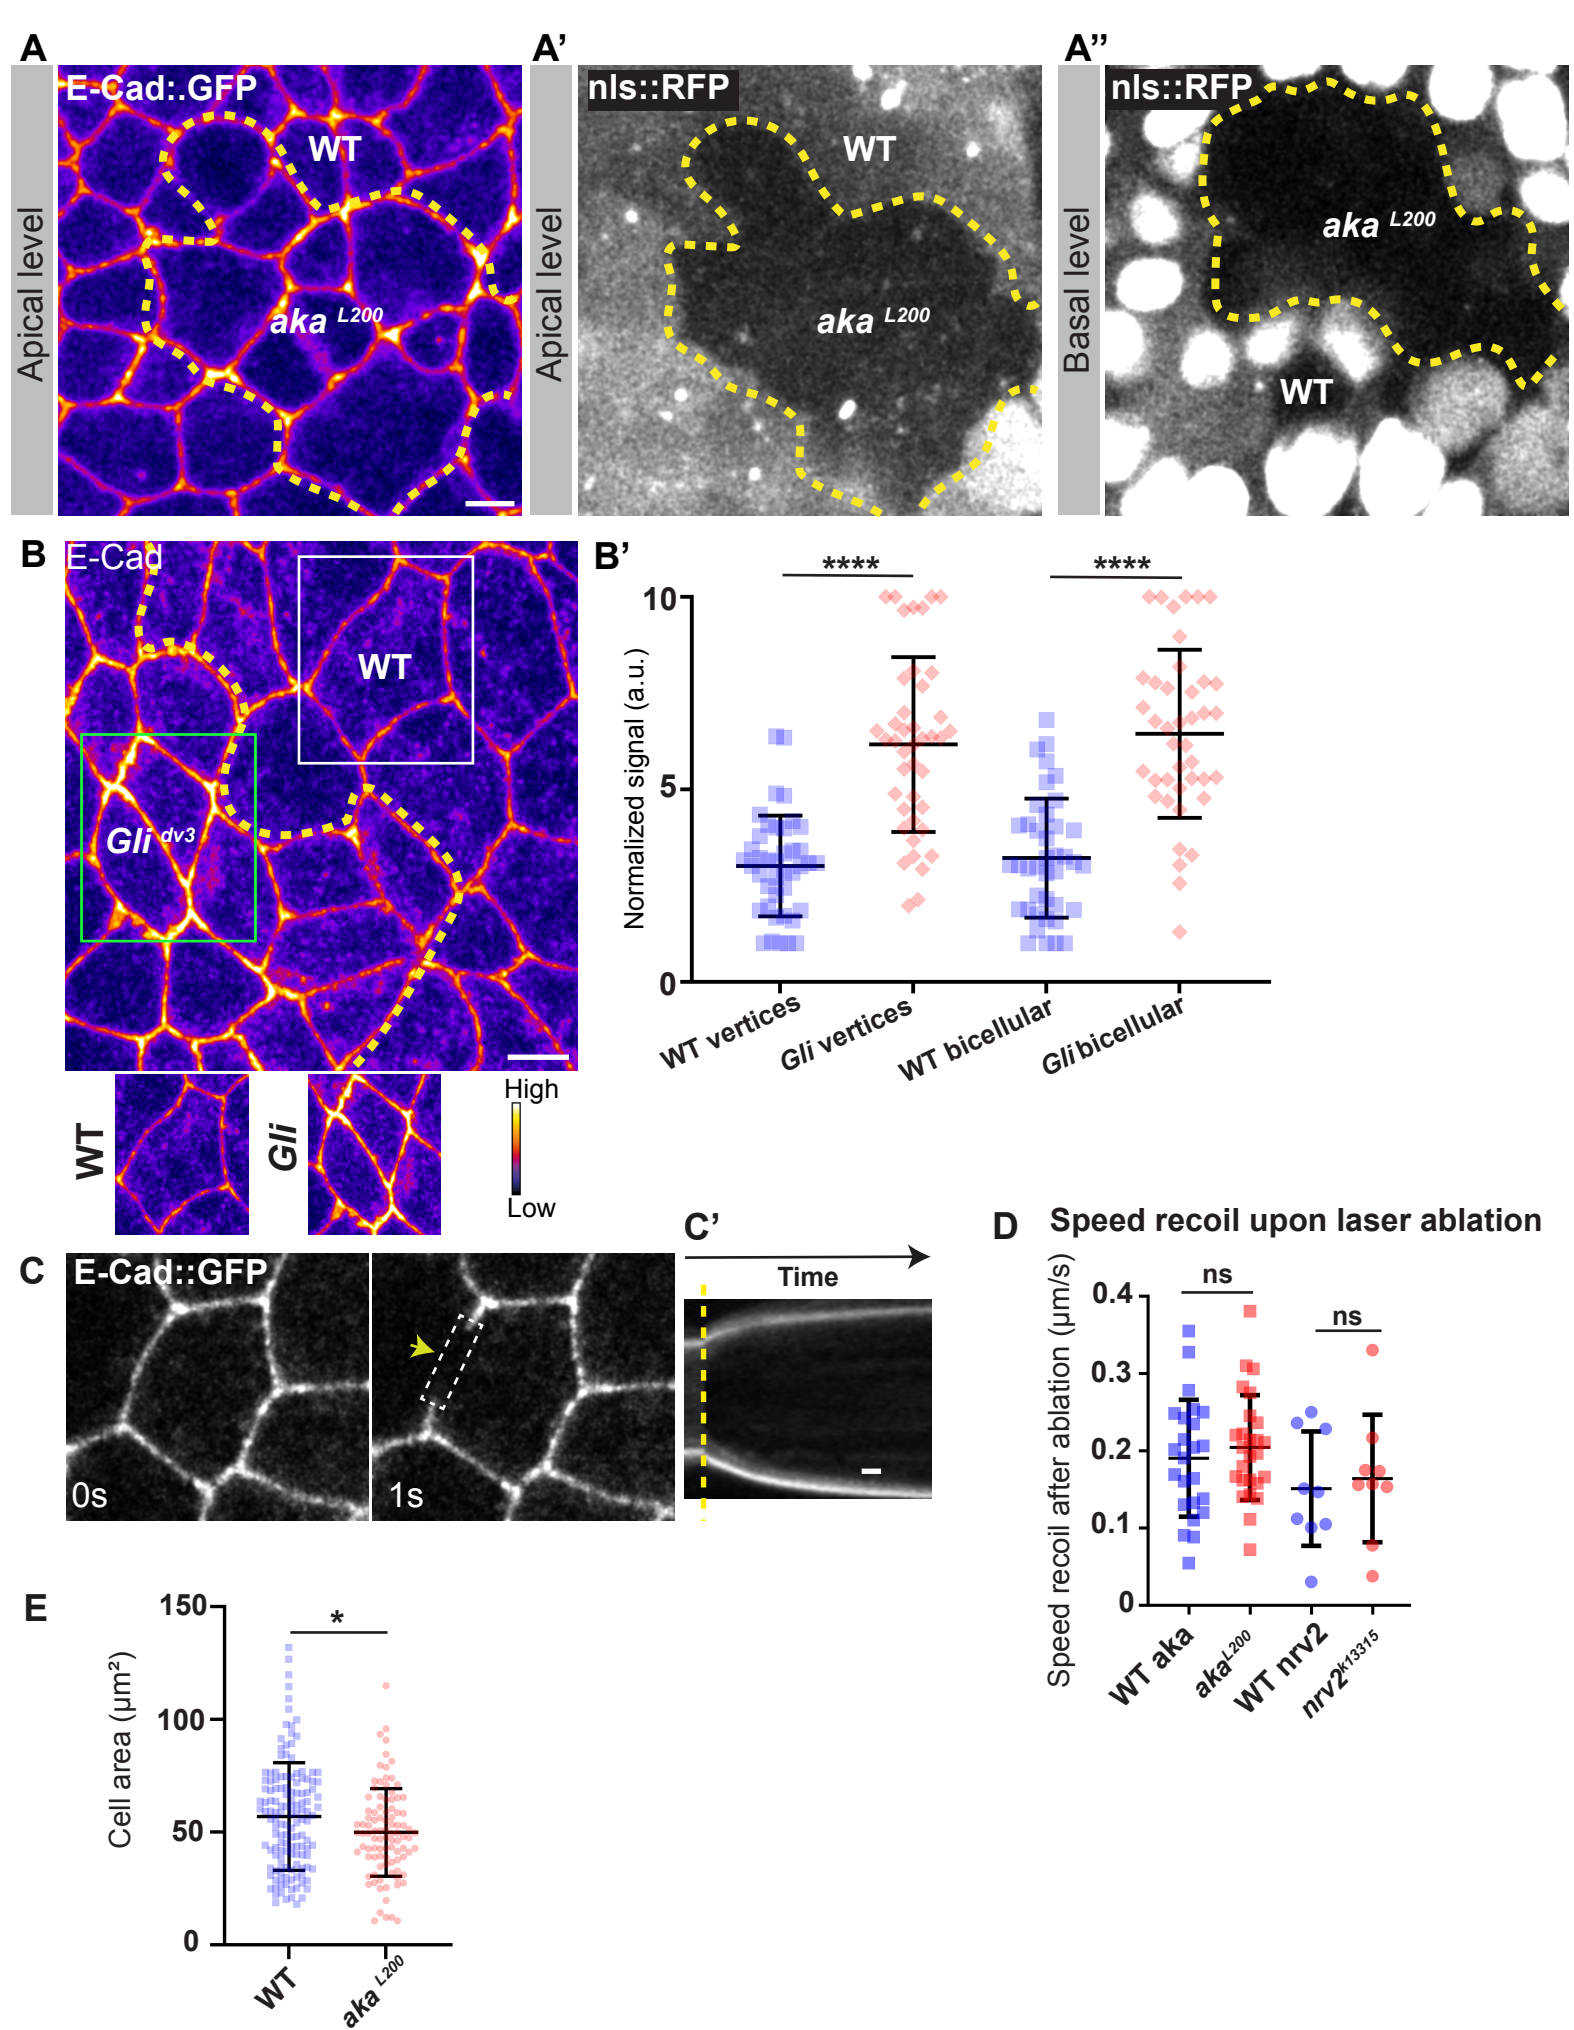

Supplement: supp [file elife-91246-supp-v1.zip]

A

*sca>Shrub RNAi*

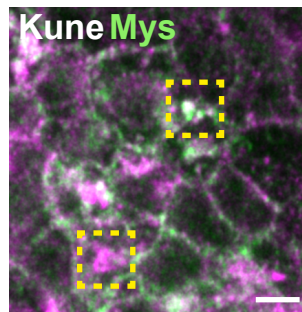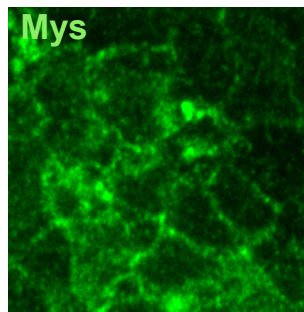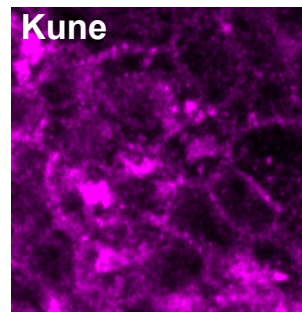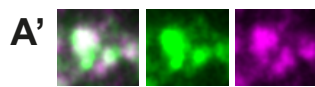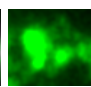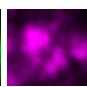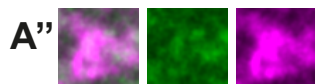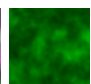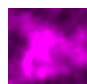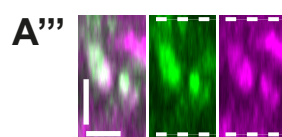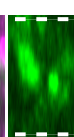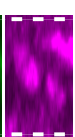

Transversal view

Apical

Basal

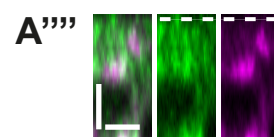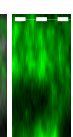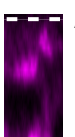

Transversal view

Apical

Basal

Supplement: supp [file elife-91246-supp-v1.zip]

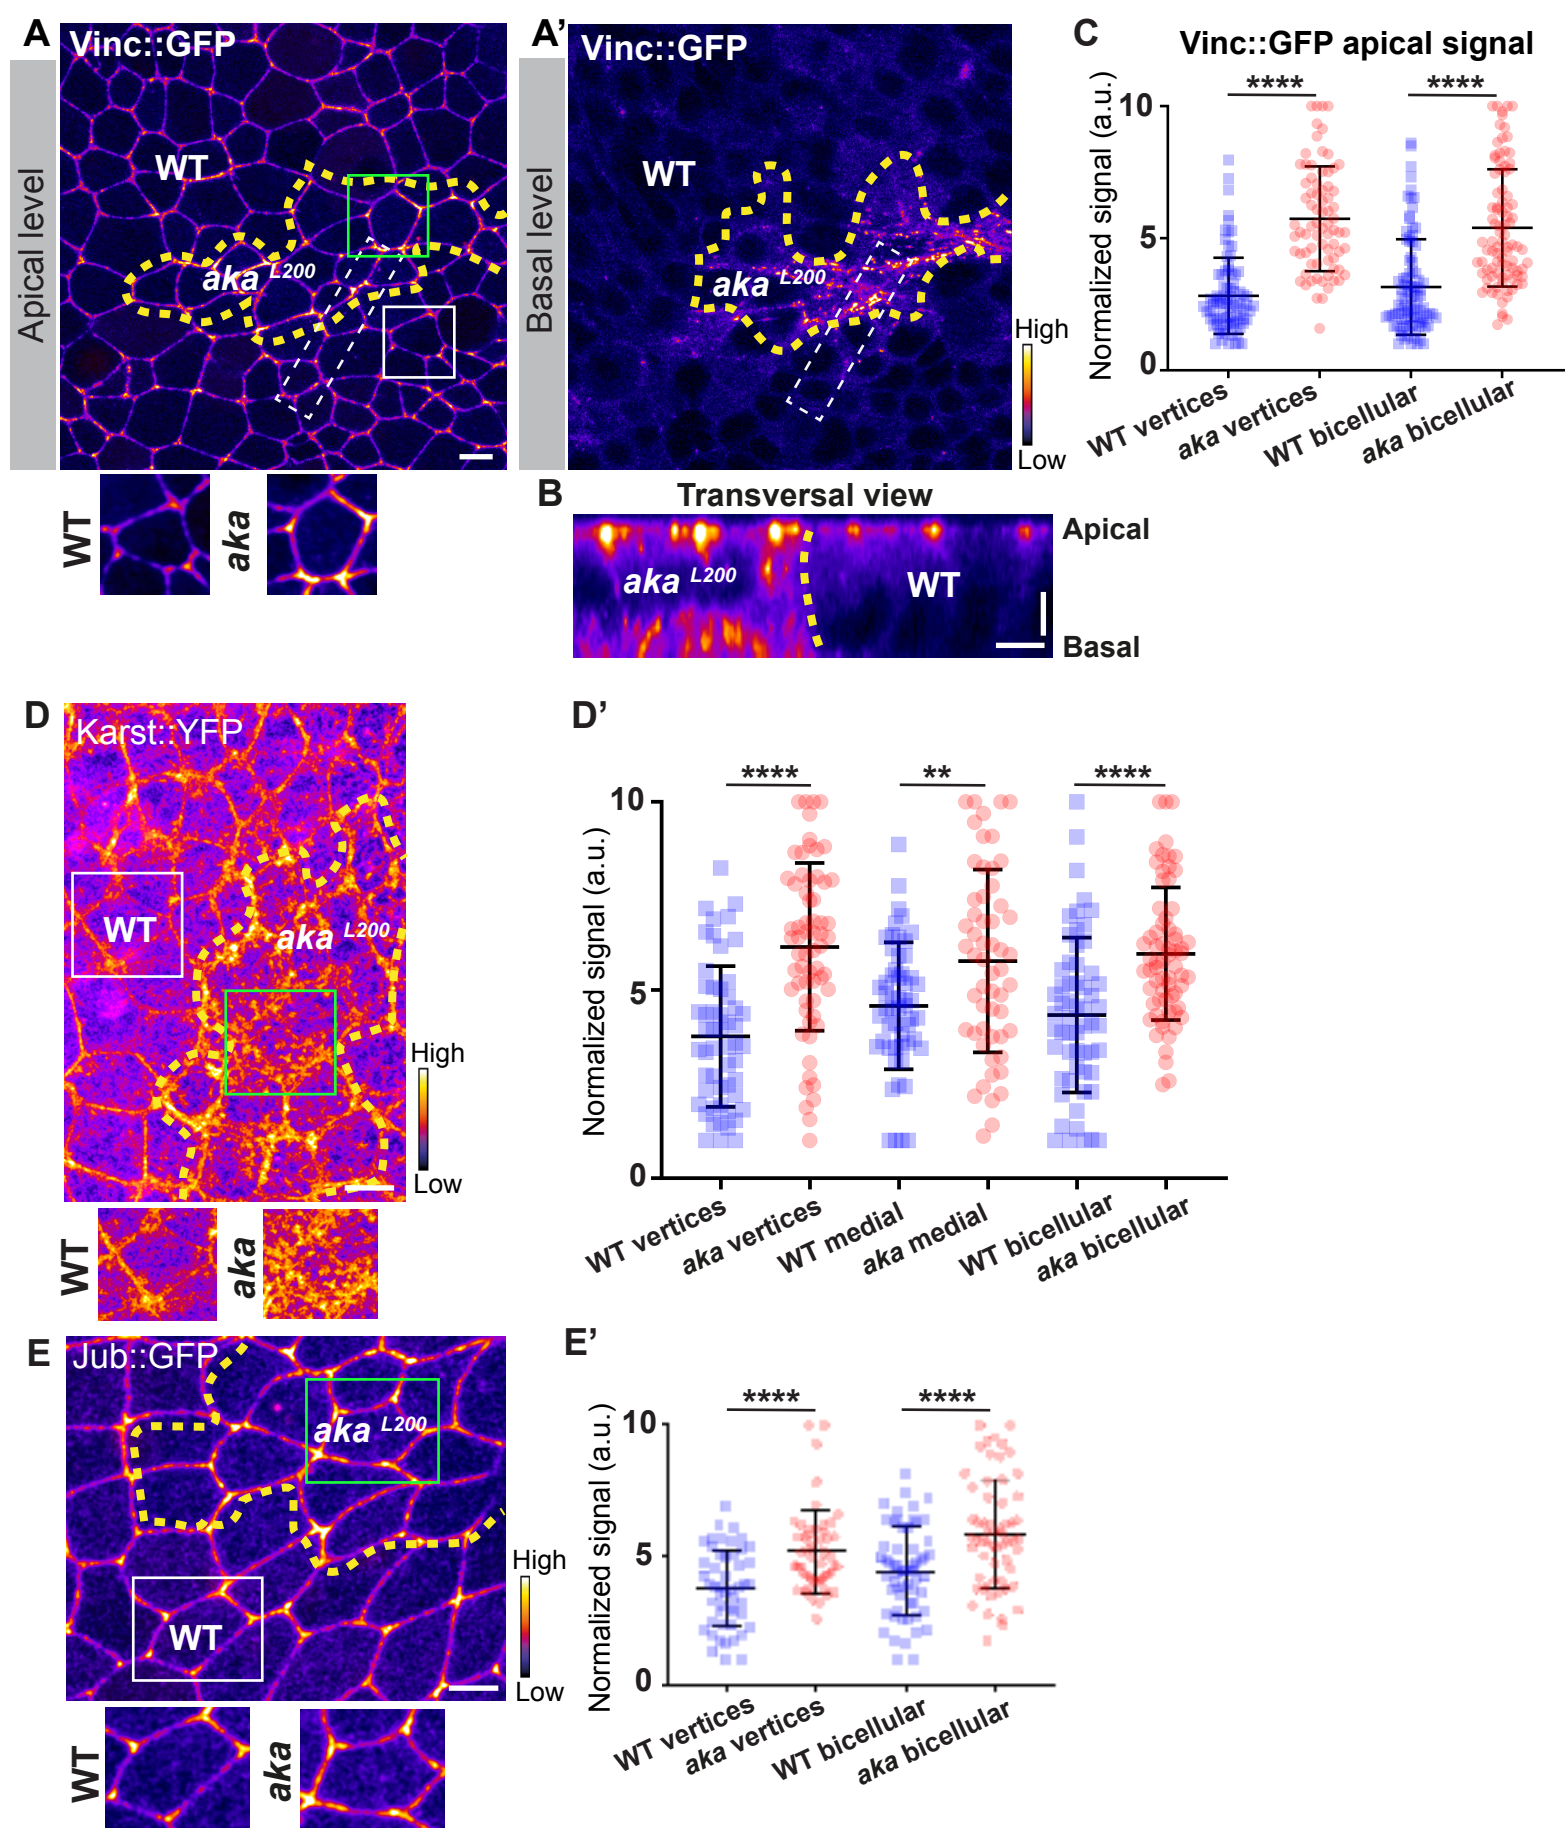

Supplement: supp [file elife-91246-supp-v1.zip]

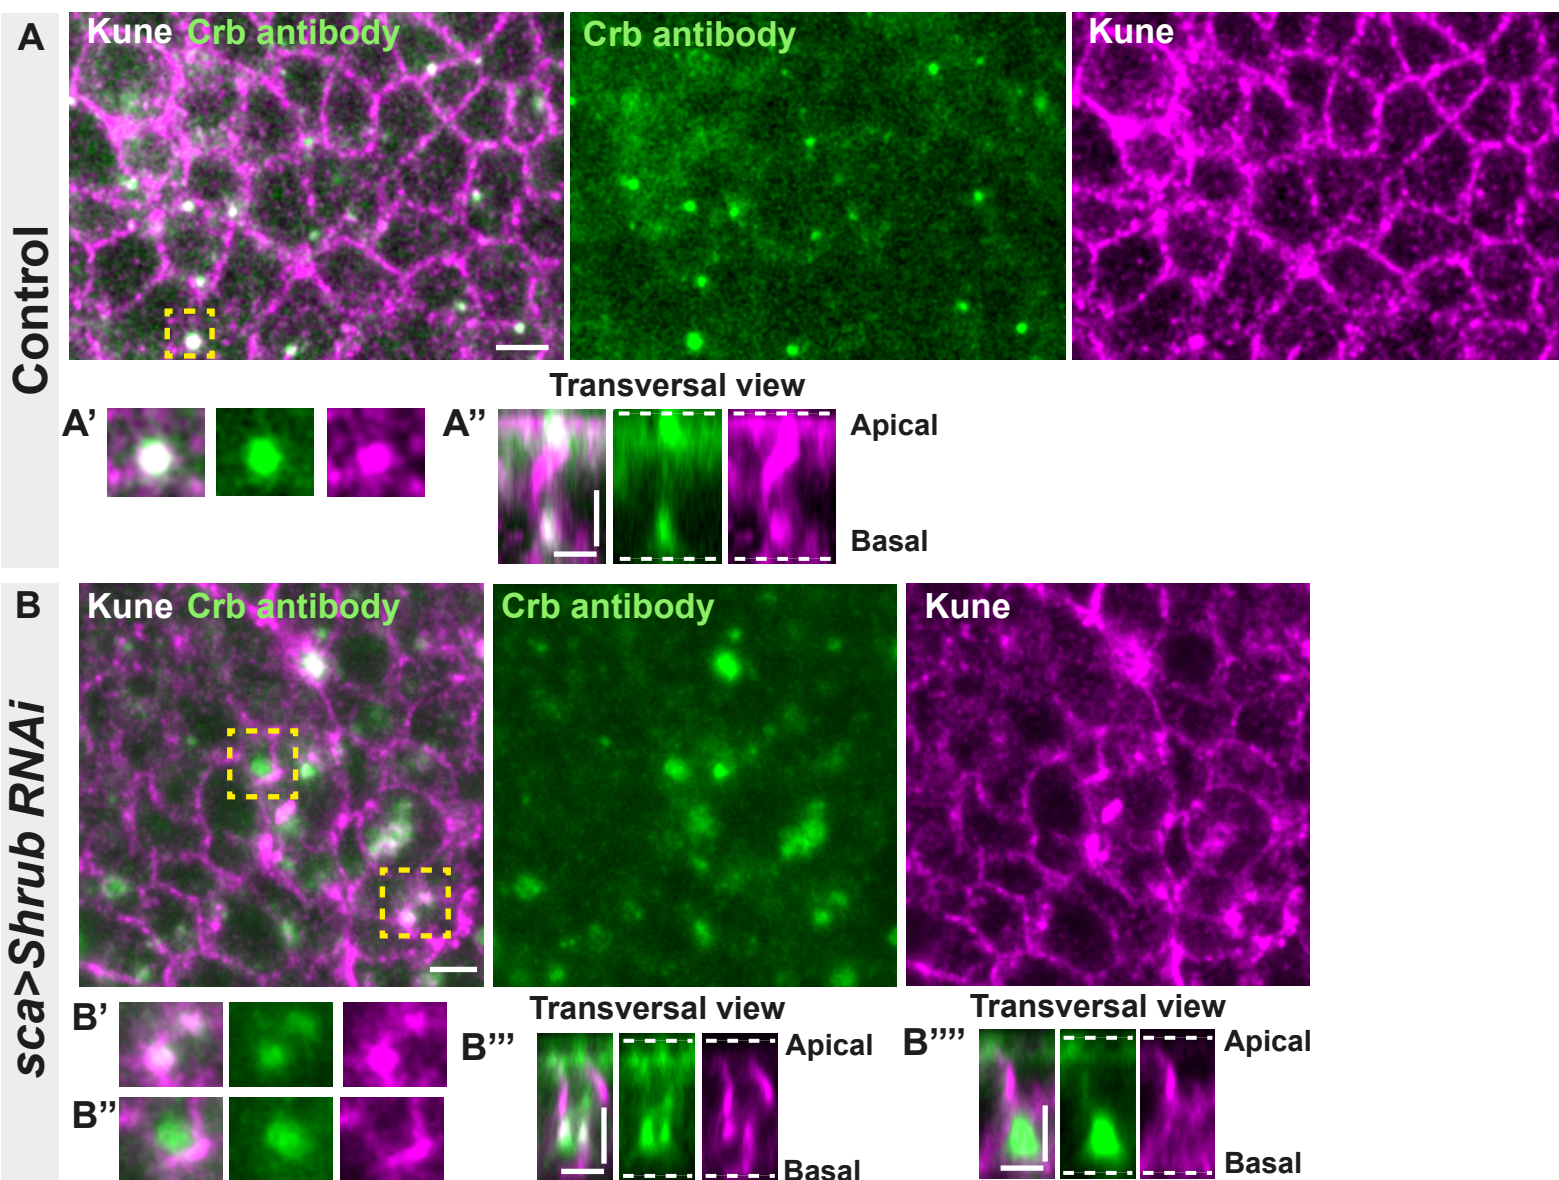

Supplement: supp [file elife-91246-supp-v1.zip]

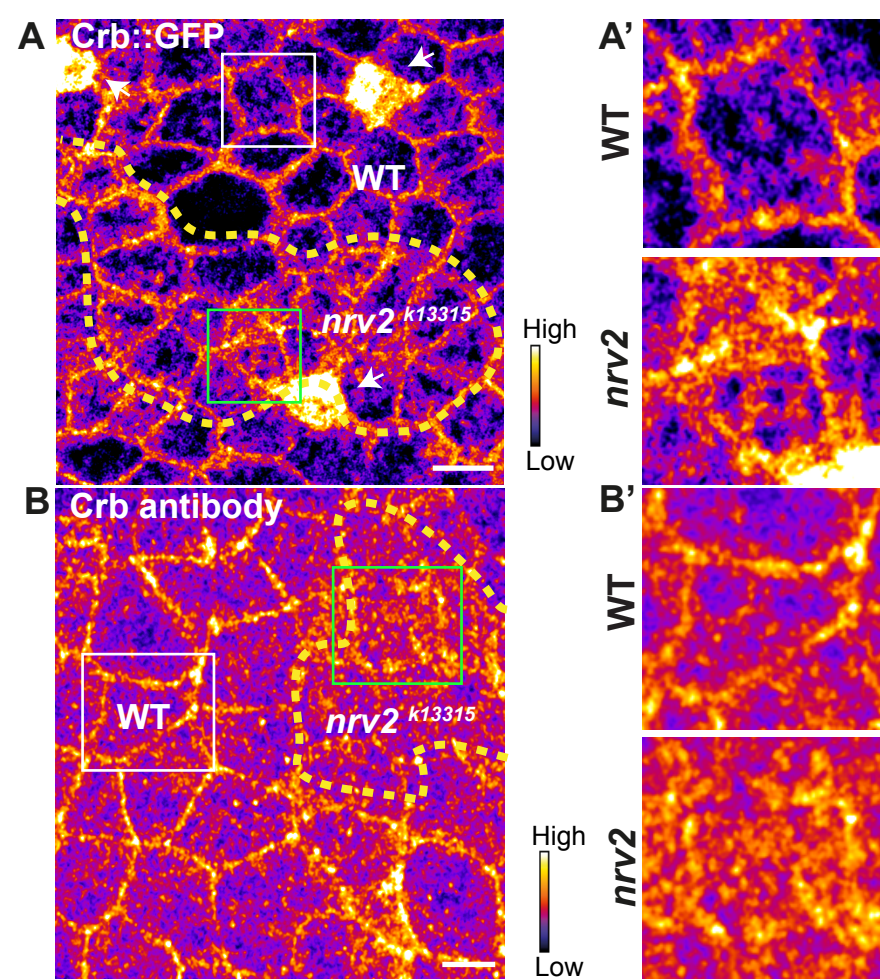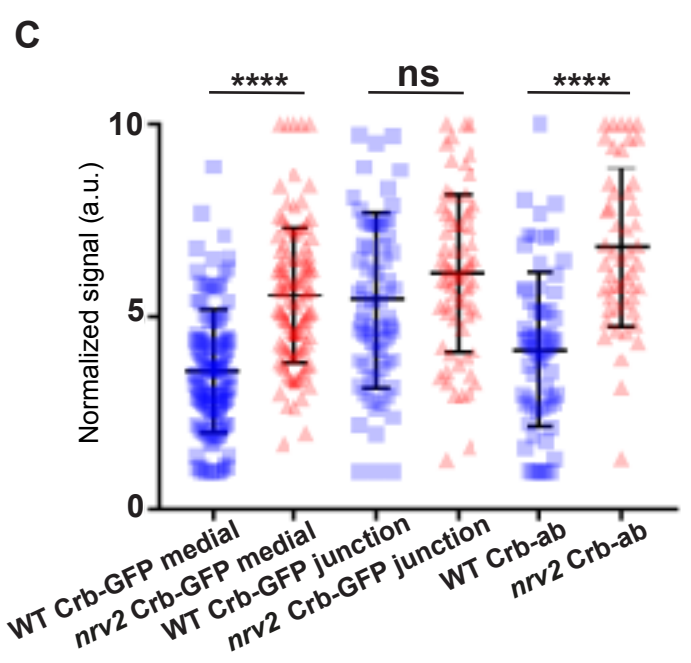

Supplement: supp [file elife-91246-supp-v1.zip]
